# Supplementary material for: [Re(CO)3(5-PAN)Cl], a rhenium(i) naphthalimide complex for the visible light photocatalytic reduction of CO2
Source: Royal Society of Chemistry journal article supplement (doi:10.1039/d0dt04116e), 2021-01-01
Supplement: d0dt04116e1.pdf [file d0dt04116e1.pdf]

## Supplementary Material

### **[Re(CO)<sub>3</sub>(5-PAN)Cl], A Rhenium(I) Naphthalimide Complex for the Visible Light Photocatalytic Reduction of CO<sub>2</sub>**

Derek R. Case<sup>†a</sup>, Alyssa Spear<sup>†a</sup>, Adam F. Henwood<sup>b</sup>, Max Nanao<sup>c</sup>, Sara Dampf<sup>a</sup>, Timothy M. Korter<sup>a</sup>, Thorfinnur Gunnlaugsson<sup>\*b</sup>,

Jon Zubieta<sup>\*a</sup>, Robert P. Doyle<sup>\*a</sup>

<sup>a</sup>111 College Place, Department of Chemistry, Syracuse University, Syracuse, NY 13244, USA

<sup>b</sup>School of Chemistry, Trinity College, The University of Dublin, Dublin 2, Ireland

<sup>c</sup>European Synchrotron Radiation Facility, Structural Biology Group, 71, Avenue des Martyrs, F-38000 Grenoble, France

\*Correspondence: 111 College Place, Department of Chemistry, Syracuse University, Syracuse, NY 13244, USA; [gunnlaut@tcd.ie](mailto:gunnlaut@tcd.ie); [jazubiet@syr.edu](mailto:jazubiet@syr.edu); [rpdoyle@syr.edu](mailto:rpdoyle@syr.edu)

## Supplementary Material- Table of Contents

|                                                                                                                            | PAGE |
|----------------------------------------------------------------------------------------------------------------------------|------|
| 1. <b>Table of Contents</b> .....                                                                                          | 2,3  |
| 1. <b>Synthesis and Characterization of 5-PAN, [Re(CO)<sub>3</sub>(H<sub>2</sub>O)<sub>3</sub>]Cl, and Re(5-PAN)</b> ..... | 4    |
| <i>Synthesis of [Re(CO)<sub>3</sub>(H<sub>2</sub>O)<sub>3</sub>]Cl and ESI-MS</i> .....                                    | 4    |
| <i><sup>13</sup>C NMR Spectrum of [Re(CO)<sub>3</sub>(H<sub>2</sub>O)<sub>3</sub>]Cl</i> .....                             | 5    |
| <i><sup>1</sup>H NMR of 5-PAN</i> .....                                                                                    | 6    |
| <i><sup>13</sup>C NMR of 5-PAN</i> .....                                                                                   | 7    |
| <i>ESI-MS of 5-PAN</i> .....                                                                                               | 8    |
| <i>FT-IR of 5-PAN</i> .....                                                                                                | 9    |
| <i>Emission-Excitation Spectra of 5-PAN</i> .....                                                                          | 10   |
| <i>Synthesis of Re(5-PAN)</i> .....                                                                                        | 11   |
| <i>MALDI-ToF of Re(5-PAN)</i> .....                                                                                        | 11   |
| <i>Emission-Excitation Spectra of Re(5-PAN)</i> .....                                                                      | 12   |
| <i>Electronic Absorption Spectra of 5-PAN/Re(5-PAN) in 1:9 (v:v) MeOH/DCM</i> .....                                        | 13   |
| <i>Electronic Absorption Spectra of Re(5-PAN) in Methanol, Degassed Methanol, and DCM</i> .....                            | 14   |
| <i><sup>1</sup>H NMR Spectrum of Re(5-PAN)</i> .....                                                                       | 15   |
| <i><sup>13</sup>C NMR Spectrum of Re(5-PAN)</i> .....                                                                      | 16   |
| <i>FT-IR of Re(5-PAN)</i> .....                                                                                            | 17   |
| <i>Elemental Analysis of Re(5-PAN)</i> .....                                                                               | 18   |
| <i>Raman spectra of chloropentacarbonyl rhenium (I) (Re(CO)<sub>5</sub>Cl) and Re(5-PAN)</i> .....                         | 19   |
| <i>In Silico Determination of the Vibrational Frequencies of Re(CO)<sub>5</sub>Cl and a Re(5-PAN) Analog</i> .....         | 20   |
| 2. <b>Detailed CO<sub>2</sub>RR Procedure</b> .....                                                                        | 21   |
| <i>Conditions for Catalytic Reduction of CO<sub>2</sub> to CO in the Presence of Re(5-PAN)</i> .....                       | 21   |
| <i><sup>13</sup>C NMR Spectrum Indicating the Presence of H<sup>13</sup>COO<sup>-1</sup> During Catalysis</i> .....        | 21   |
| <i><sup>13</sup>C NMR Spectrum of 5-PAN Utilized for Catalysis in the Presence of Blue Light</i> .....                     | 22   |
| <i><sup>13</sup>C NMR Spectrum Indicating Catalytic Photo-Dependence of Re(5-PAN)</i> .....                                | 23   |
| <i>Overview of Re(I) based mononuclear complexes reported to catalyze the reduction of CO<sub>2</sub></i> .....            | 24   |
| <i>Calibration Curves of the Integration of Formate Conducted at D1 Scan times of 1s, 2s, and 5s</i> .....                 | 25   |
| <i>Turnover Numbers Produced from Re(5-PAN) Calculated from Formate Integration Curves</i> .....                           | 26   |

References.....27

## 1. Synthesis and Characterization of 5-PAN, $[\text{Re}(\text{CO})_3(\text{H}_2\text{O})_3]\text{Cl}$ , and $\text{Re}(\text{5-PAN})$

### Synthesis of $[\text{Re}(\text{CO})_3(\text{H}_2\text{O})_3]\text{Cl}$

Chloropentacarbonyl rhenium(I) (8.45 mmol, 3.0551 g) was dissolved in 50 mL of water in a 100 mL round bottom flask. The solution was left to reflux and monitored via TLC (70/30 hexanes/ethyl acetate) until full conversion was observed. The reflux of chloropentacarbonyl rhenium (I) can take up to four days for full conversion. The solvent was removed and the solid dried *in vacuo*. The white/green solid was obtained in ~93% yield (2.5451 g).

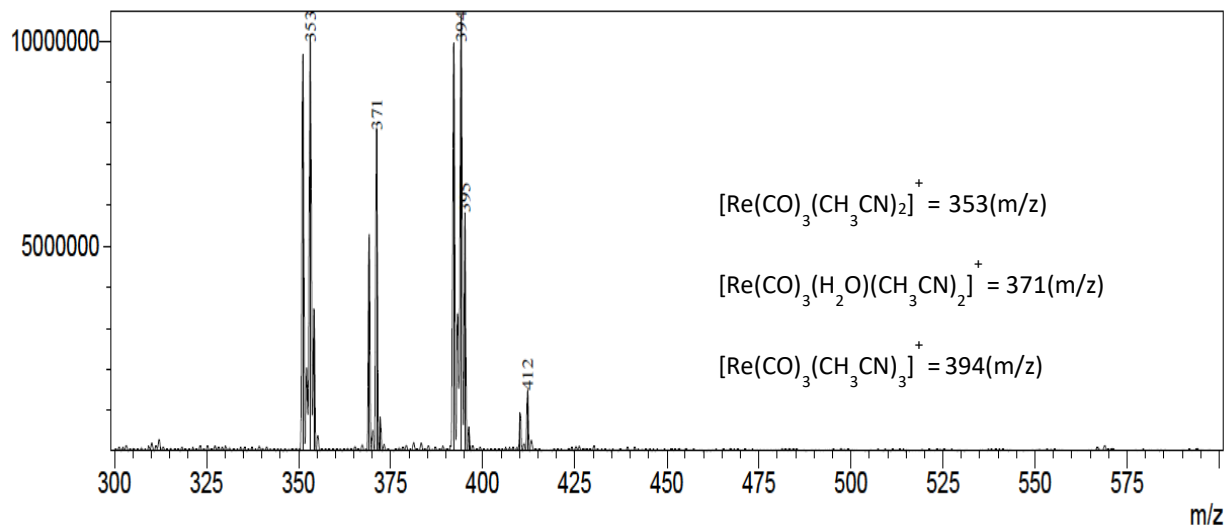

**S1.** Electrospray.  $[\text{Re}(\text{CO})_3(\text{H}_2\text{O})_3]^+$  was dissolved in methanol and characterized via ESI-MS in the presence of acetonitrile and water with 0.1% TFA. Both the di- and trisubstituted acetonitrile adducts were observed at 353, 371, and 394 m/z, respectively. Expected mass = 324 g/mol.

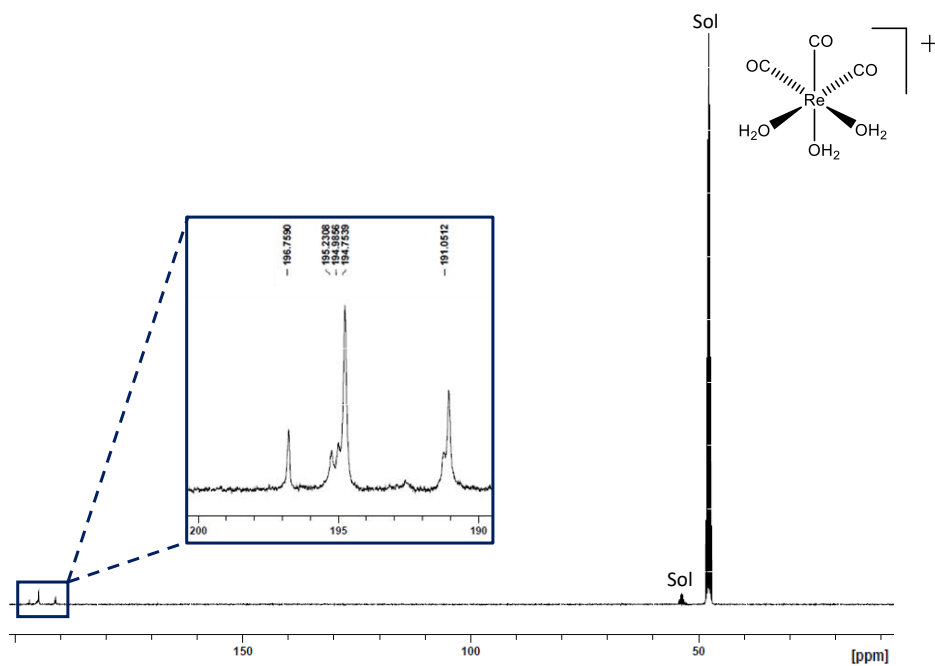

**S2.**  $^{13}\text{C}$  NMR of  $[\text{Re}(\text{CO})_3(\text{H}_2\text{O})_3]\text{Cl}$  in deuterated methanol ( $\text{CD}_3\text{OD}$ ) showing distinct carbonyl peaks between 190 – 200ppm.

### Synthesis of **5-PAN**

1,10-phenanthroline-5-amine (2 mmol, 390 mg) and 4-nitro-naphthalic anhydride (2 mmol, 486 mg) were each placed in a 50 mL round bottom flask with 20 mL of anhydrous ethanol. Each were placed in a sand bath to reach 65°C after which, the solutions were combined and set to reflux under argon for 48 hours. The solvent was reduced in volume by half *in vacuo* and diethyl ether was added to further precipitate the product. The mixture was centrifuged, and the ether decanted. The tan solid was washed with methanol and acetonitrile and dried overnight under vacuum. **5-PAN** was obtained in ~44% yield (276 mg).

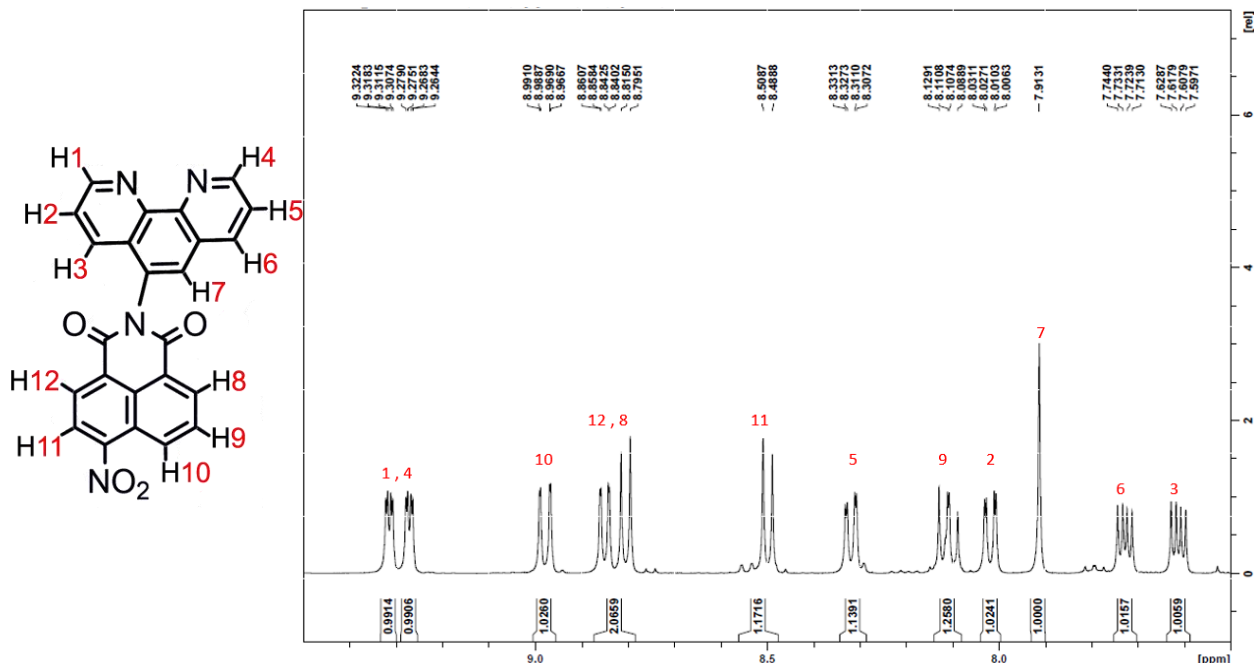

**S3.** <sup>1</sup>H NMR spectrum of **5-PAN** with zoomed in aromatic region (400 MHz, chloroform-d) δ 9.32-9.31 (dd, 1H), 9.28-9.26 (dd, 1H), 9.00-8.97 (dd, 1H), 8.86-.84 (dd, 1H), 8.82-8.80 (d, *J* = 8.0 Hz, 1H), 8.51-8.49 (d, *J* = 8.0 Hz, 1H), 8.33-8.31 (dd, 1H), 8.13-8.09 (dd, 1H), 8.03-8.00 (dd, 1H), 7.91 (s, 1H), 7.74-7.71 (dd, 1H), 7.63-7.60 (dd, 1H).

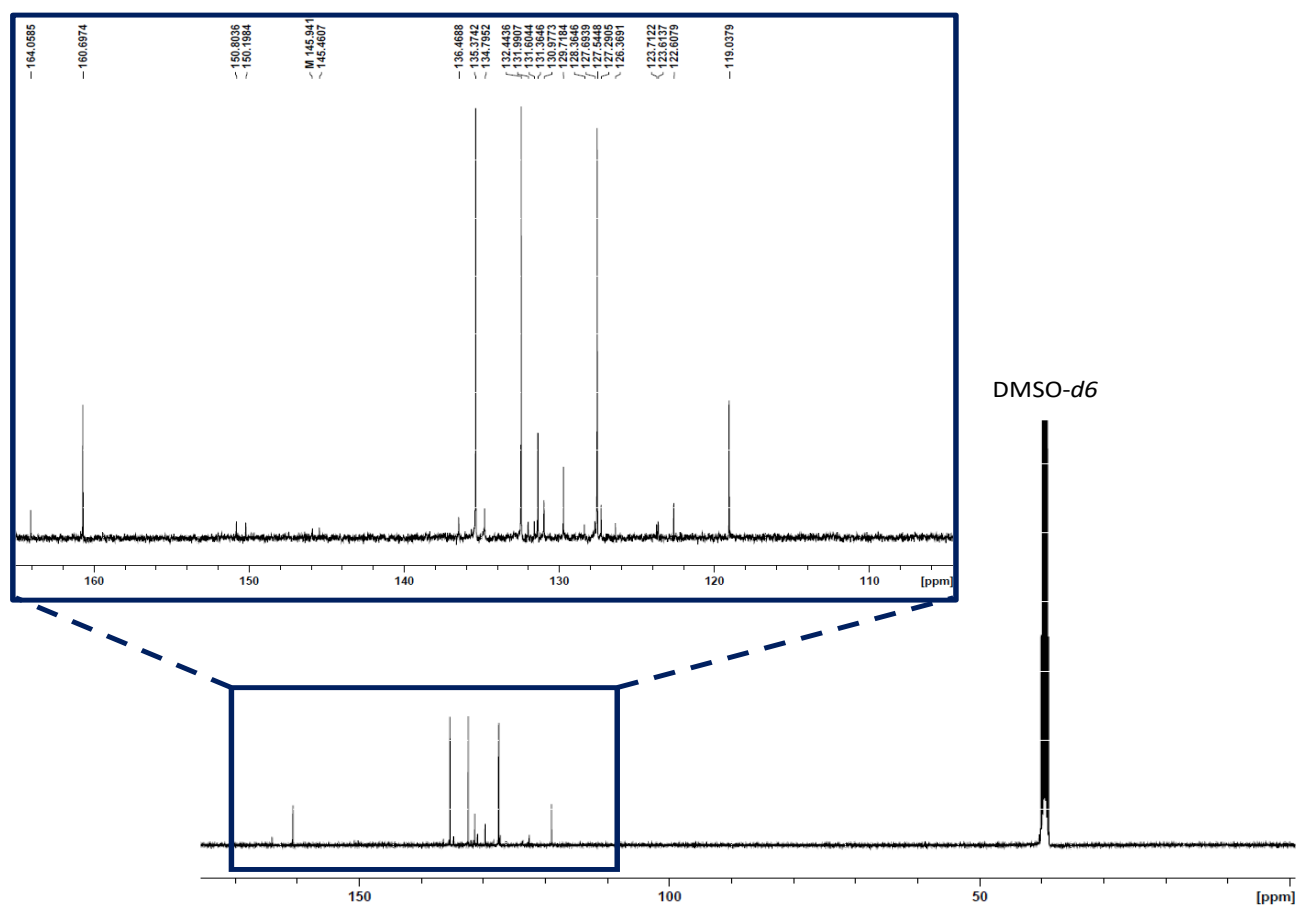

**S4.**  $^{13}\text{C}$  NMR of the free **5-PAN** ligand acquired in  $\text{DMSO-}d_6$  showing the appropriate number of 24 carbon signals with the signals beyond 160 being assigned to ketone carbons of the naphthal core. Unlike the **Re(5-PAN)** complex, there is no presence of the rhenium tricarbonyl core carbons.

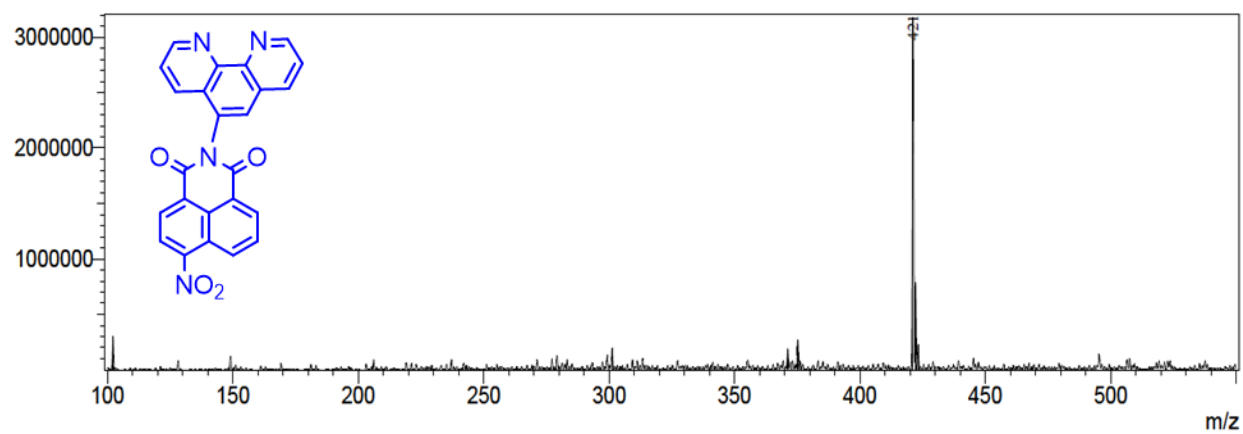

**S5.** Electrospray mass spectrometry **5-PAN** was dissolved in DCM and run in the presence of methanol. Expected mass was 420 g/mol.

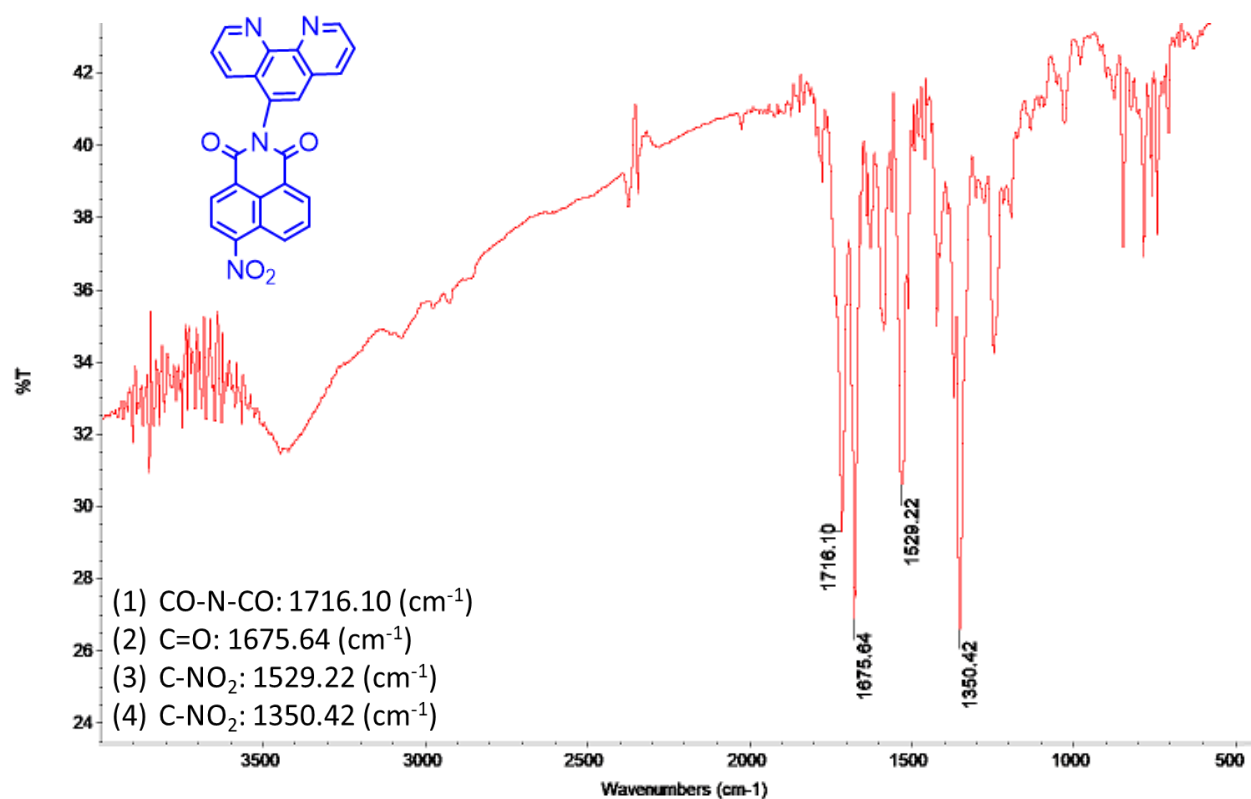

**S6.** FT-IR of **5-PAN** (KBr,  $\text{cm}^{-1}$ ) CO-N-CO: 1716.10, C=O: 1675.64, C-NO<sub>2</sub>: 1529.22, C-NO<sub>2</sub>: 1350.42

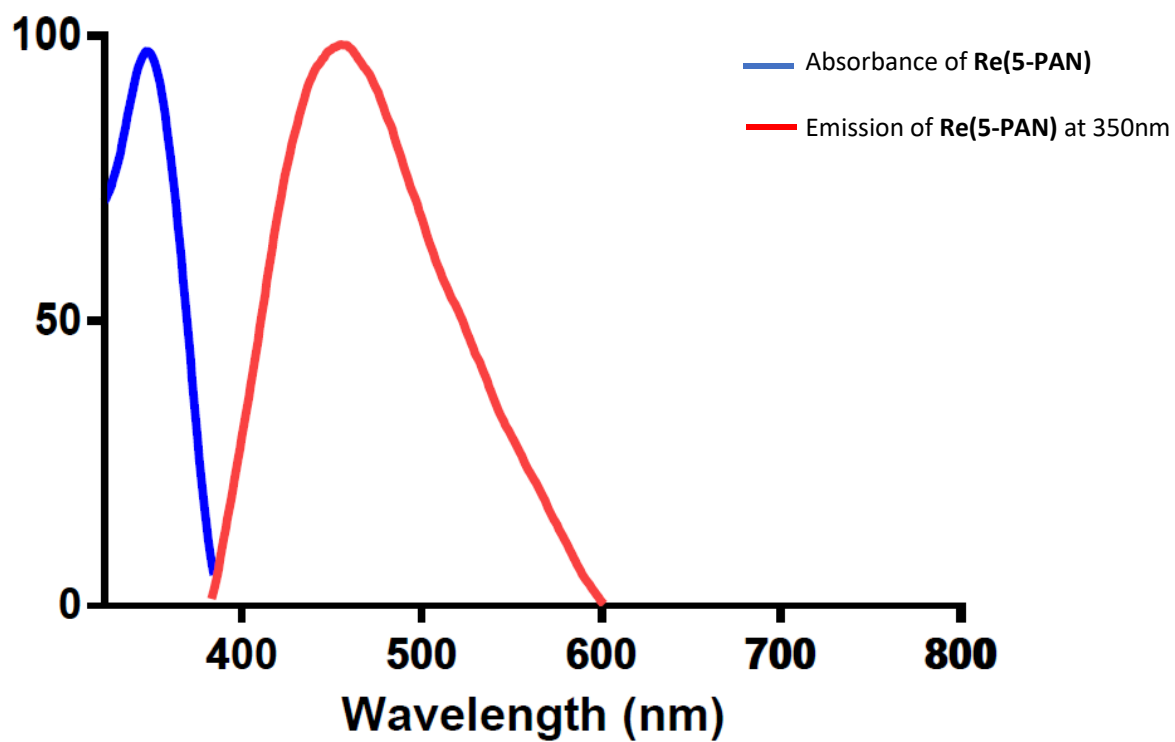

**S7.** Absorption-emission spectra **5-PAN** in 1:9 (v:v) MeOH/DCM showing an excitation  $\lambda_{\text{max}}$  of 350 nm and an emission  $\lambda_{\text{max}}$  of 456 nm for a subsequent Stokes shift of 106 nm.

*Synthesis of (Re(5-PAN))*

$\text{Re}(\text{CO})_3(\text{H}_2\text{O})_3\text{Cl}$  (0.26 mmol, 94.12 mg) and **5-PAN** (0.26 mmol, 110 mg) were each added to a 50 mL round bottom flask along with 15 mL of MeOH/DCM (1:9 v:v). After completely dissolved, the two were combined, put under argon, and stirred for 1.5 hours. The solution volume was reduced to half and diethyl ether was added to precipitate the product. The mixture was centrifuged, and the ether decanted. The yellow solid was collected and dried under vacuum overnight.

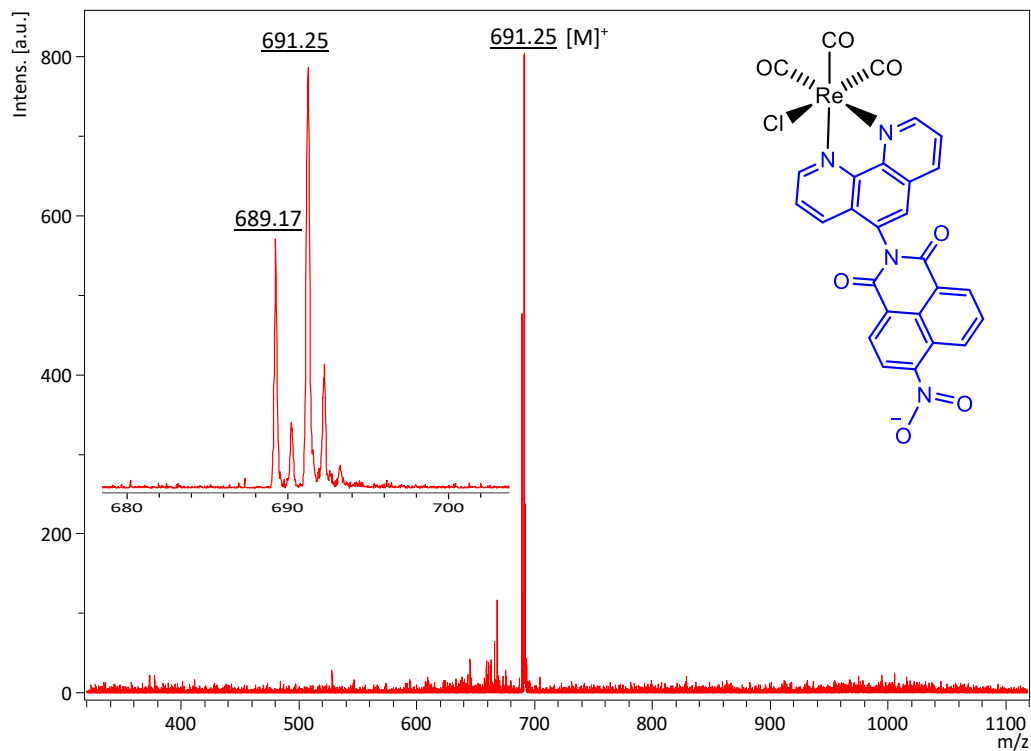

**S8.** MALDI-ToF spectrum of **Re(5-PAN)** Expected peak = 691 ( $m/z$ ) for **Re(5-PAN)** without the  $\text{Cl}^-$  anion and water solvate.

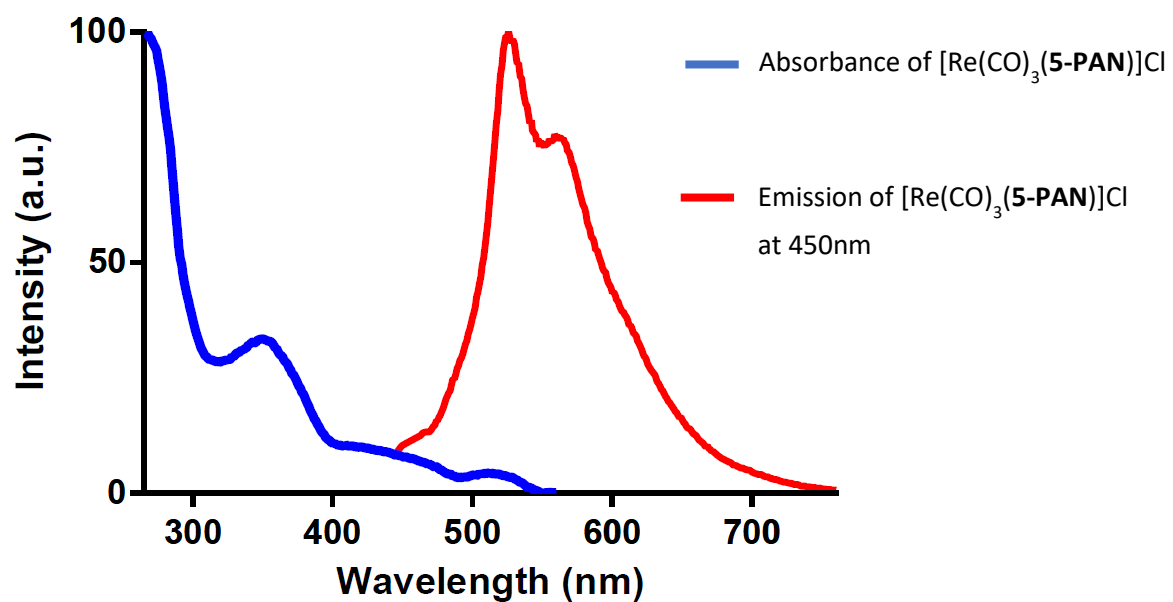

S9. Electronic absorption (blue) and emission (red) spectra of **Re(5-PAN)** for determination of achievable excitation with blue light was collected in a solution of 1:9 (v:v) MeOH/DCM.  $\lambda_{\text{max}} = 526\text{nm}$  when excited at 450nm.

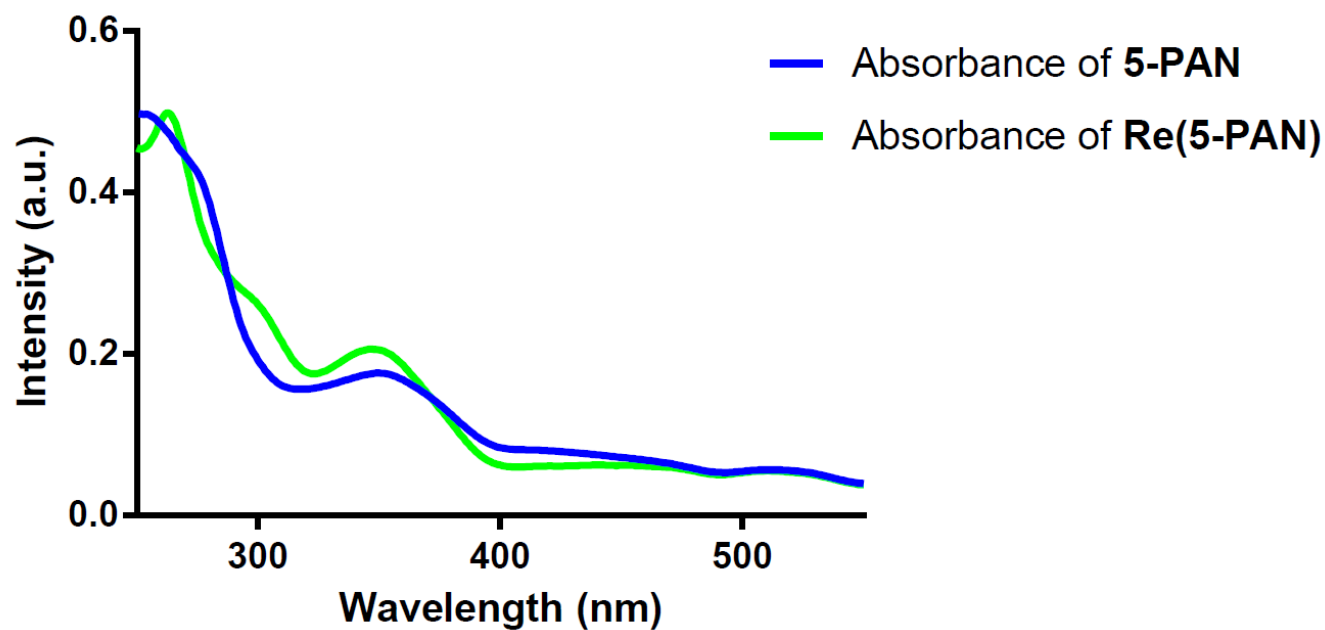

**S10.** Electronic absorption spectra of both **5-PAN** and **Re(5-PAN)** conducted in 1:9 (v:v) MeOH/DCM collected at equimolar concentration showing a broadening of the  $\lambda_{\text{max}}$  value of **5-PAN** upon coordination to rhenium and a shift in absorbance toward blue wavelengths.

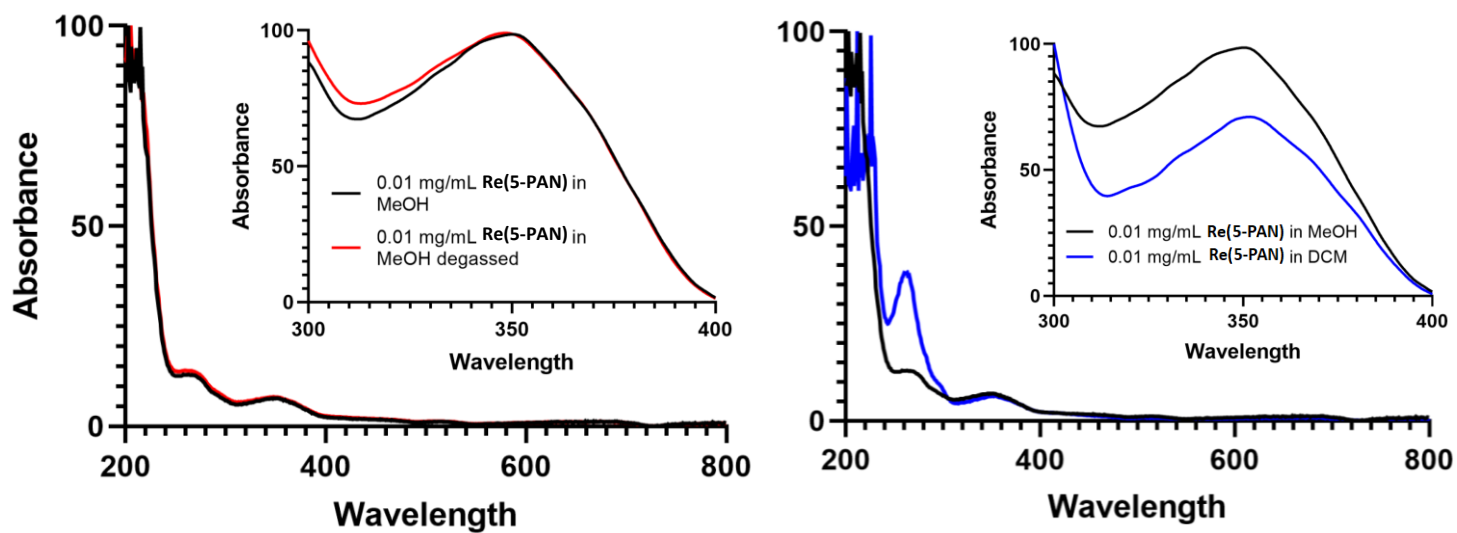

**S11.** Electronic absorption spectrum of **Re(5-PAN)** conducted in both methanol and dichloromethane (right) showing a minimal red shift (2nm) of the absorption spectrum of **Re(5-PAN)** in a less polar solvent. Also depicted is the electronic absorption spectrum of **Re(5-PAN)** in both methanol and degassed methanol (left) – electronic absorption spectrum was collected utilizing samples of equimolar concentration of 0.0134  $\mu\text{M}$ . Insets show a zoom of the region of interest containing the MLCT band from 300 – 400 nm.

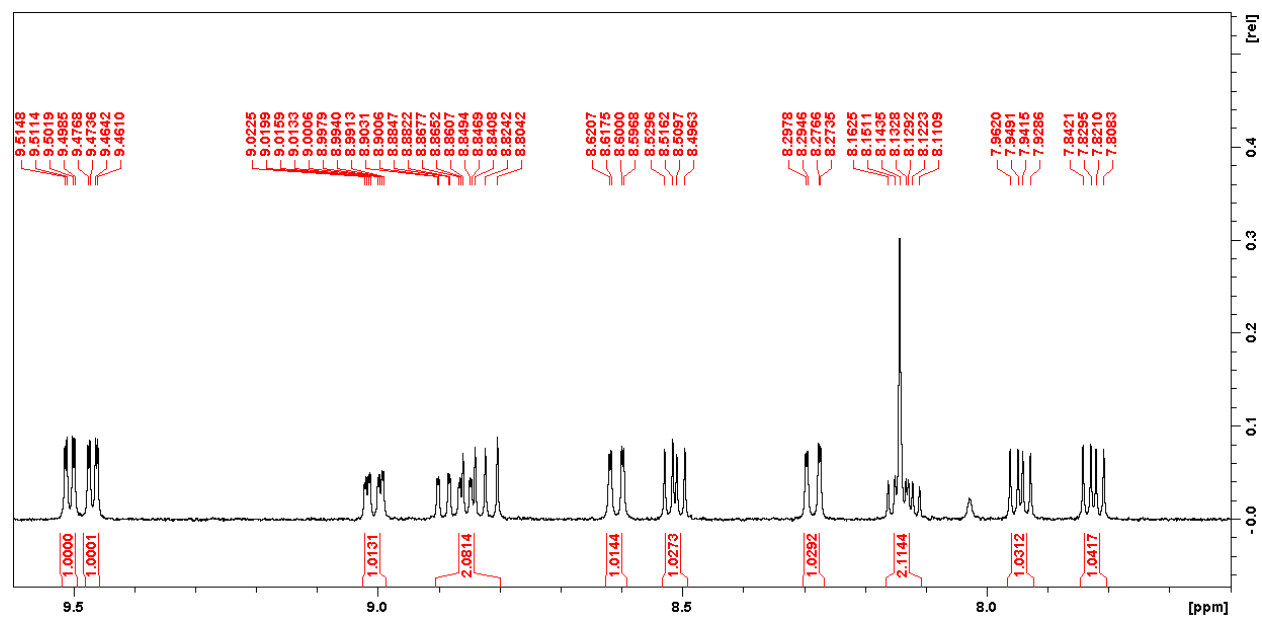

**S12.**  $^1\text{H}$  NMR spectrum of **Re(5-PAN)** with zoomed in aromatic region (400 MHz, Chloroform- $d$ )  $\delta$  9.51-9.50 (dd, 1H), 9.48-9.46 (dd, 1H), 9.02-9.00 (ddd, 1H), 8.90-8.80 (2H, overlapped), 8.62-8.60 (dd, 1H), 8.53-8.50 (dd, 1H), 8.30-8.27 (dd, 1H), 8.16-8.11 (2H, overlapped), 8.00-7.92 (dd, 1H), 7.84-7.81 (dd, 1H).

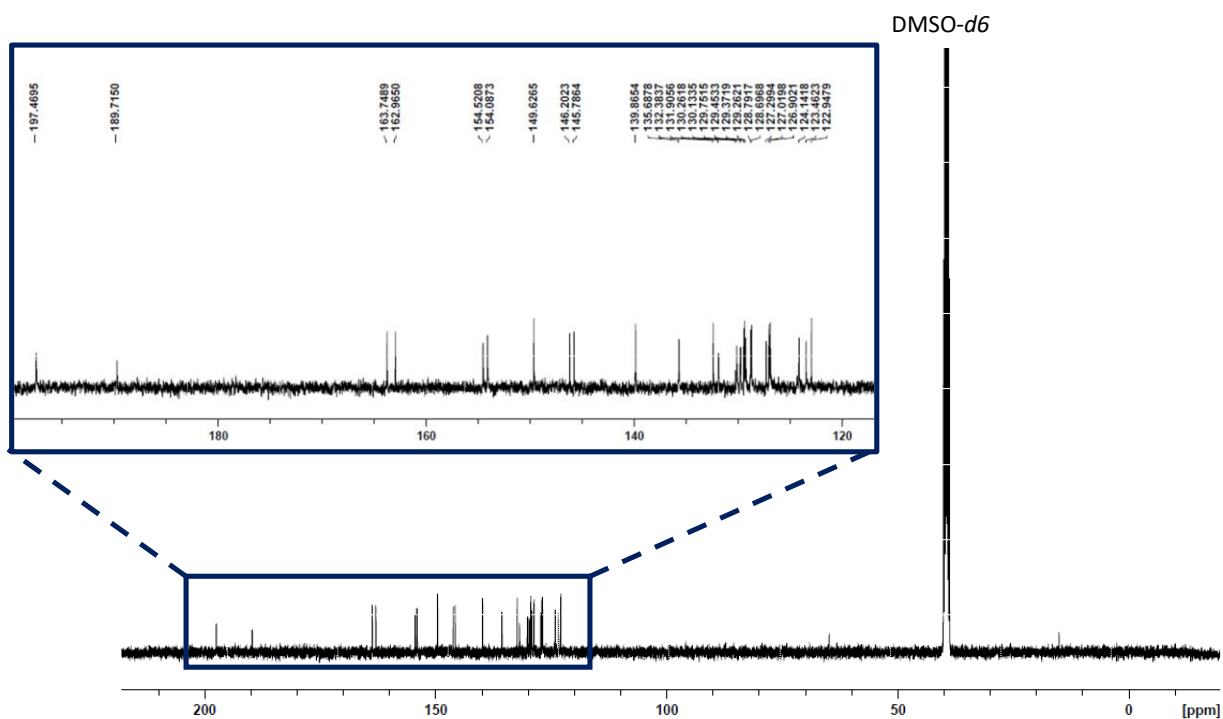

**S13.**  $^{13}\text{C}$  NMR spectrum of the **Re(5-PAN)** complex, acquired in DMSO-*d*<sub>6</sub>, exhibiting the appropriate number of carbon signals – with the carbon signals at 189ppm and 197ppm, respectively, assigned as the carbonyl carbons of the rhenium tricarbonyl core.

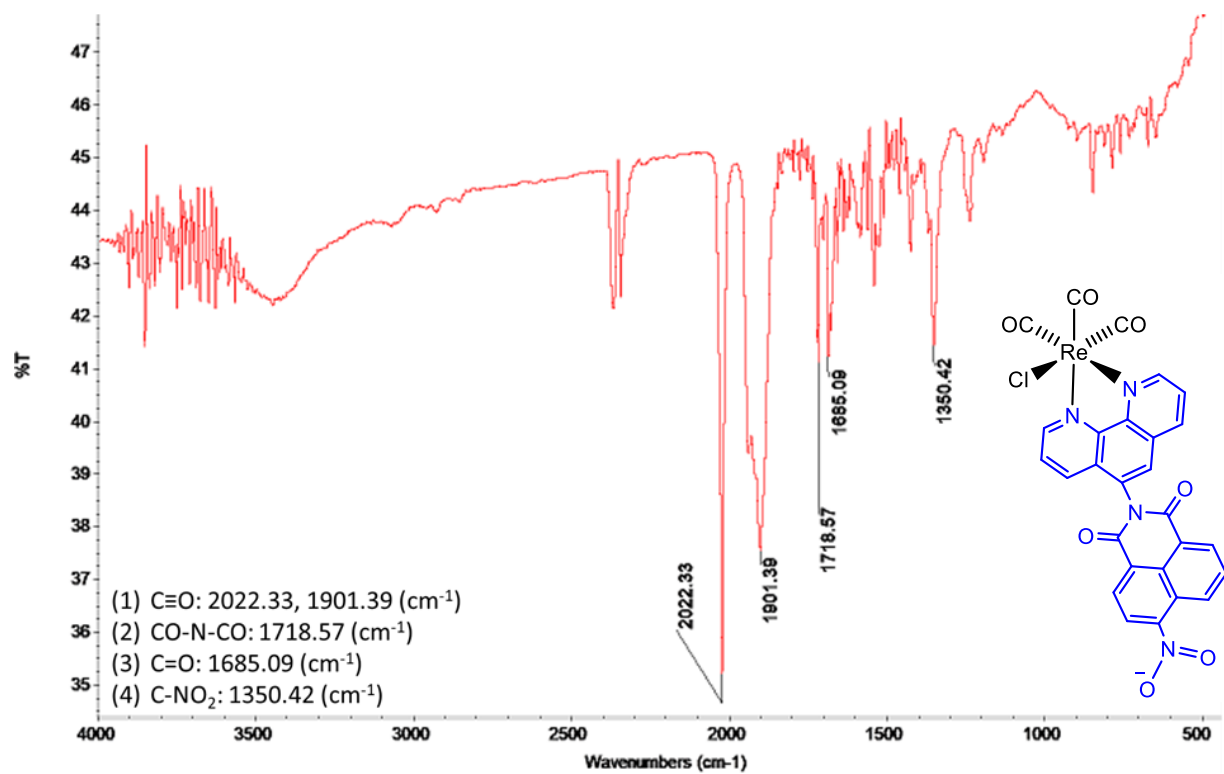

**S14.** FT-IR of **Re(5-PAN)** (KBr,  $\text{cm}^{-1}$ )  $\text{C}\equiv\text{O}$ : 2022; 1901,  $\text{CO-N-CO}$ : 1716,  $\text{C=O}$ : 1685.09,  $\text{C-NO}_2$ : 1350

| Elemental Analysis of $[\text{Re}(\text{CO})_3(5\text{-PAN})\text{Cl}]$ |       |      |       |
|-------------------------------------------------------------------------|-------|------|-------|
| $[\text{Re}(\text{CO})_3(5\text{-PAN})\text{Cl}]$                       | %C    | %H   | %N    |
| Theoretical                                                             | 44.08 | 1.66 | 7.62  |
| Sample 1                                                                | 44.08 | 1.79 | 7.07  |
| Sample 2                                                                | 42.58 | 2.16 | 7.12  |
| Average                                                                 | 43.33 | 1.98 | 7.10  |
| Error                                                                   | -0.75 | 0.32 | -0.52 |

**S15.** Elemental Analysis of **Re(5-PAN)** performed by Intertek (Whitehouse, NJ, USA).

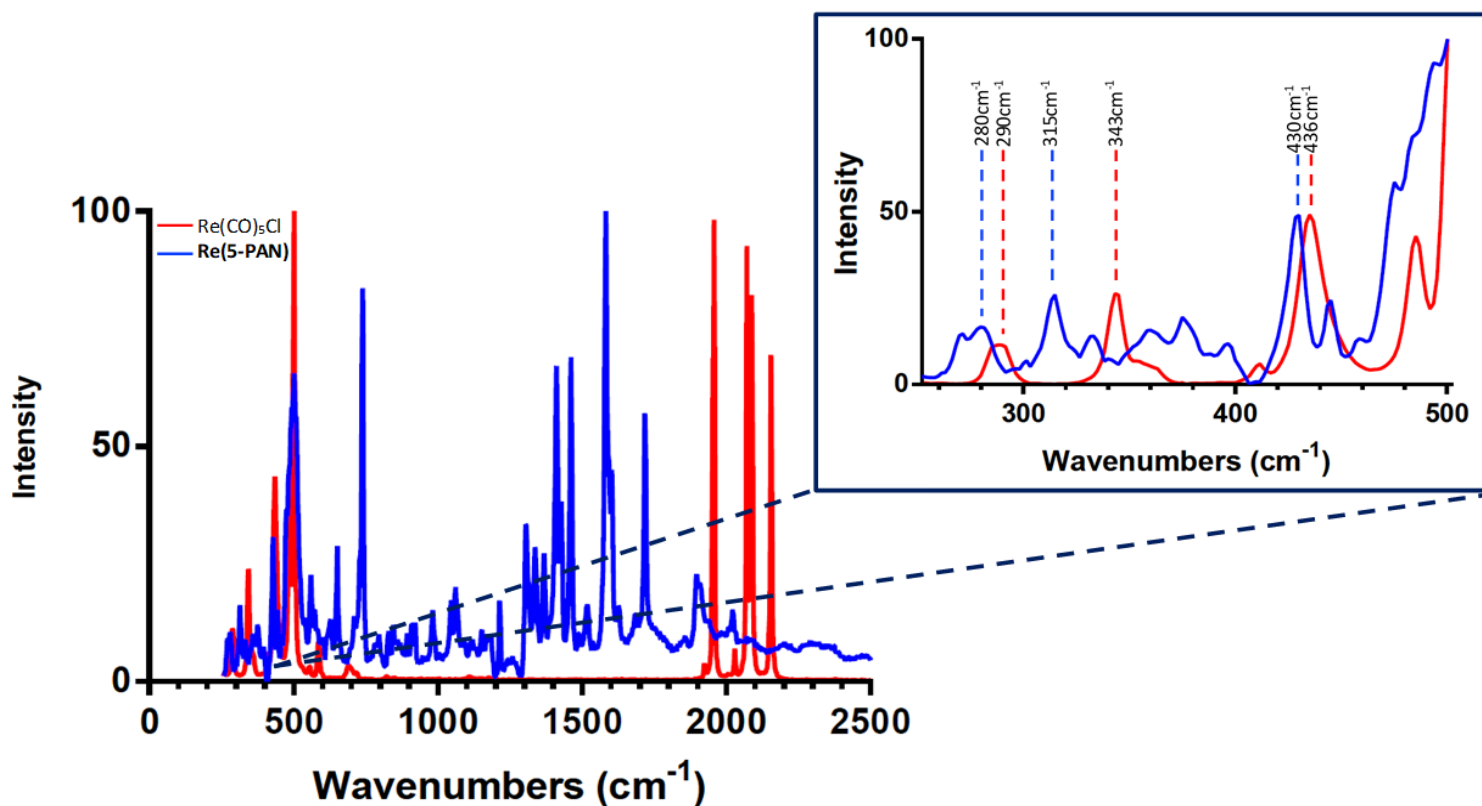

**S16.** Raman spectra of previously reported starting material chloropentacarbonyl rhenium (I) ( $\text{Re}(\text{CO})_5\text{Cl}$  - red) and  $\text{Re}(\text{5-PAN})$  (blue) highlighting the solid-state rhenium-chloride bonds at 290 and 280 cm<sup>-1</sup>, respectively. Raman spectra were collected using a fiber-coupled i-Raman Plus spectrometer (B&W Tek, Newark DE) with an excitation wavelength of 785 nm. Final spectra are the product of 100 averages of 1 s integration windows and have a spectral resolution of ~4 cm<sup>-1</sup>. The Raman spectral intensities have been normalized to one. In the case of  $\text{Re}(\text{5-PAN})$ , the Raman spectrum showed a significant fluorescence background with well-defined Raman peaks on top of this. An approximate polynomial baseline representing the fluorescence interference was subtracted from the final data shown here. See also DFT calculations in Figure S17.

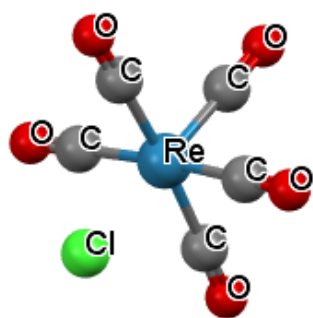

**Re(CO)<sub>5</sub>Cl**

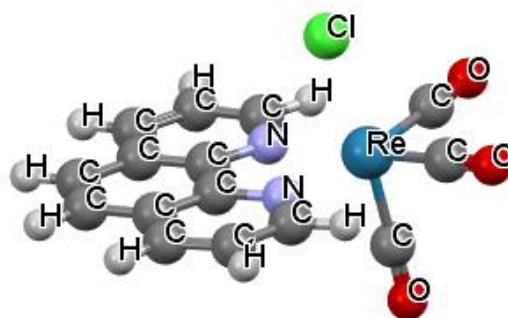

**Re(CO)<sub>3</sub>(Phen)Cl**

**S17.** *In silico* determination of the predicted rhenium-chloride vibrational frequencies of **Re(CO)<sub>5</sub>Cl** and a **Re(5-PAN)** analog (**Re(CO)<sub>3</sub>(Phen)Cl**) (Reindicating shift to a lower vibrational frequency). Density functional theory simulations of the monomeric molecular structures and vibrational frequencies of Re(CO)<sub>5</sub>Cl and Re(C<sub>12</sub>H<sub>8</sub>N<sub>2</sub>)(CO)<sub>3</sub>Cl were performed with the Gaussian 16 (Revision A.03) software package. The calculations utilized the B3LYP density functional and def2-TZVP basis set for all atoms. Point group symmetry was utilized in both species, with Re(CO)<sub>5</sub>Cl in *C<sub>4v</sub>* and Re(C<sub>12</sub>H<sub>8</sub>N<sub>2</sub>)(CO)<sub>3</sub>Cl (**Re(CO)<sub>3</sub>(Phen)Cl**) in *C<sub>s</sub>*. Convergence quality was increased from the default configuration using program settings of integral (grid=superfine) and opt=verytight. Harmonic vibrational frequency analyses of the optimized structures revealed no imaginary eigenvalues, verifying each structure to represent an energetic minimum on the potential energy surface. For Re(CO)<sub>5</sub>Cl: Re-Cl (Exp.) = 2.515 Å, Re-Cl (DFT) = 2.500 Å. DFT Re-Cl stretching frequency = 296.65 cm<sup>-1</sup>. For Re(C<sub>12</sub>H<sub>8</sub>N<sub>2</sub>)(CO)<sub>3</sub>Cl: Re-Cl (Exp.) = 2.500 Å, Re-Cl (DFT) = 2.495 Å. DFT Re-Cl stretching frequency = 281.08 cm<sup>-1</sup>.<sup>1,2</sup>

## 2. Detailed CO<sub>2</sub>RR procedure

**Re(5-PAN)** was evaluated for catalytic reduction of CO<sub>2</sub> to CO in the presence of blue light (450nm) utilizing <sup>13</sup>C NMR tracking of H<sup>13</sup>COO<sup>-1</sup> - a product of the catalytic reduction cycle. In each sample tested, 13.5 mg (0.018 mmol) of **Re(5-PAN)** was dissolved in approximately 5 mL of CH<sub>3</sub>OH/DCM (1:9 v:v) and supplemented with 0 – 300 equiv. of triethylamine (TEA, 0 – 5.44 mmol) as a sacrificial donor. All samples were kept at 5 mL total reaction volume, irradiated with blue light at a constant distance from the reaction vessel, and bubbled with <sup>13</sup>CO<sub>2</sub> evolved in-situ with 0.500 g Ba<sup>13</sup>CO<sub>3</sub> and 1M H<sub>2</sub>SO<sub>4</sub> drip for 1.5 hours. For each trial, the drip rate was set such that the Schlenk flask holding the Ba<sup>13</sup>CO<sub>3</sub> was full at the end of 1.5 hr and the H<sub>2</sub>SO<sub>4</sub> was well in excess. Runs were done at least in triplicate.

At the end of each trial, 500 µL of the reaction solution and 100 µL of CDCl<sub>3</sub> was added to an NMR tube and wrapped in aluminum foil until it was ready to be loaded into the NMR. The TEA peaks at ~10.46 and ~45.71 ppm were integrated and set to 1. The H<sup>13</sup>COO<sup>-1</sup> peak at ~160 ppm was integrated and with the known moles of TEA, the relative moles of H<sup>13</sup>COO<sup>-1</sup> was calculated.

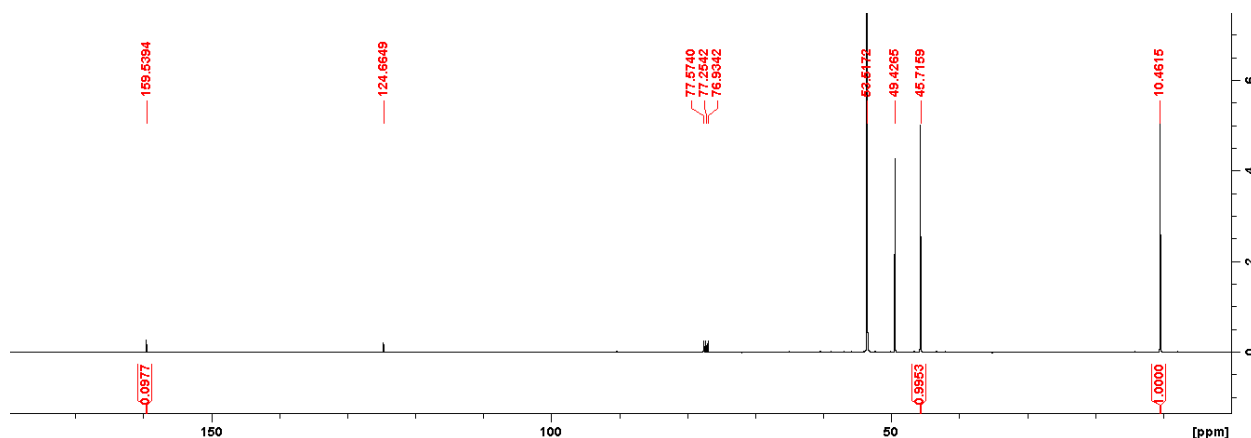

**S18.** <sup>13</sup>C NMR for **Re(5-PAN)** and 150 equiv. TEA. The TEA peaks are at 10.4615 and 45.7159 ppm. Methanol peak is at 49.4265 ppm. DCM peak is at 53.5172 ppm. CDCl<sub>3</sub> peaks are at 76.9342, 77.2542, and 77.5740 ppm. <sup>13</sup>CO<sub>2</sub> peak is at 124.6649 ppm. H<sup>13</sup>COO<sup>-1</sup> 159.5394 ppm.

Catalysis utilizing blue light in the presence of **5-PAN**

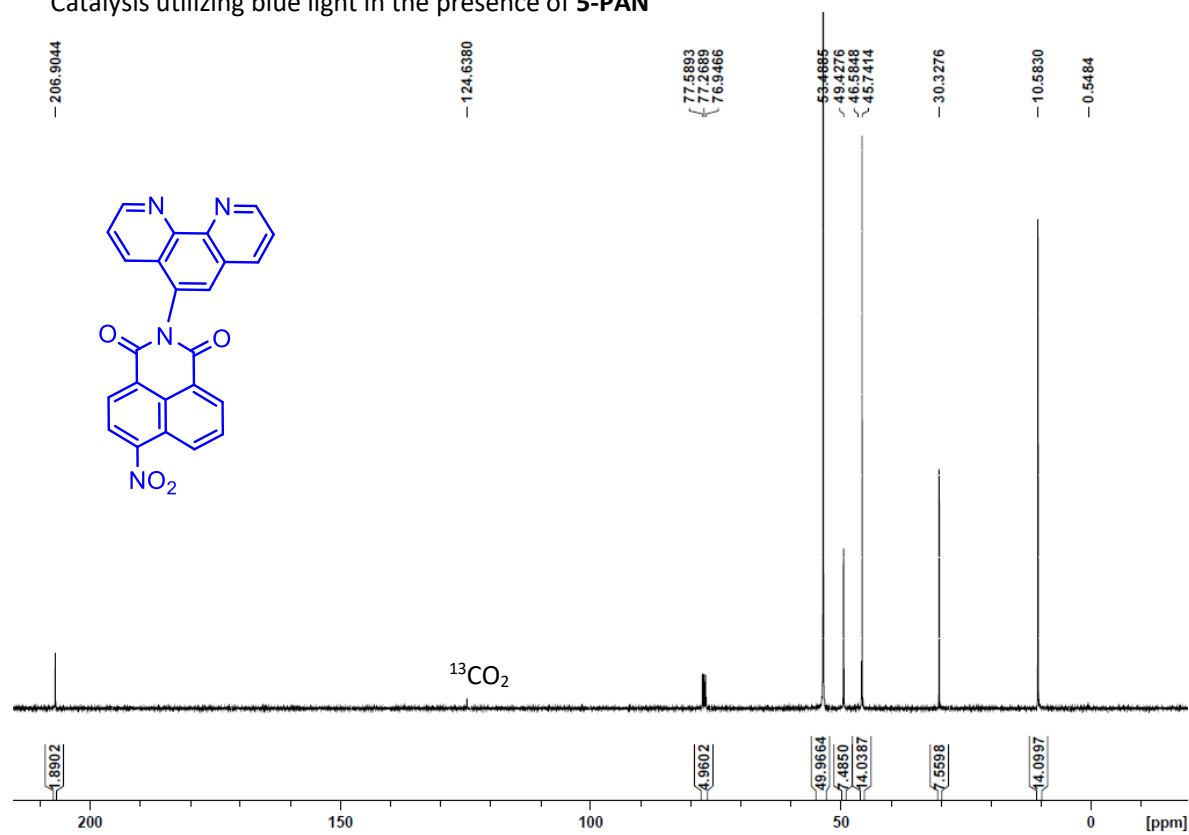

**S19.**  $^{13}\text{C}$  NMR of a  $\text{CO}_2$ /**5-PAN** solution in 1:9 (v:v) MeOH/DCM indicating only the presence of  $^{13}\text{CO}_2$  when photoirradiated at 450 – 460 nm – suggesting no catalysis without the **Re(5-PAN)** complex. All other peaks are attributed to solvent, including a minor acetone impurity as noted by the peaks at 30 and 207ppm, respectively, or sacrificial donor TEA.

No blue light in the presence of **Re(5-PAN)**

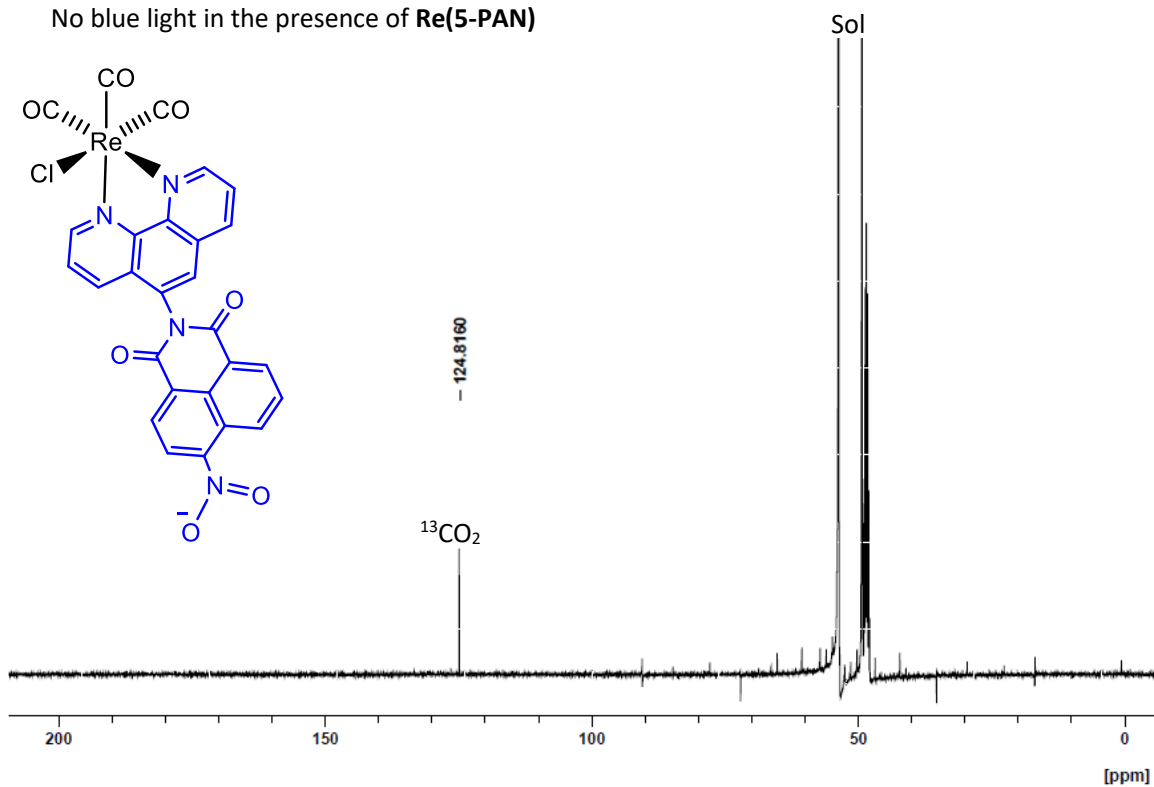

**S20.**  $^{13}\text{C}$  NMR of a  $\text{CO}_2/\text{Re(5-PAN)}$  solution in 1:9 (v:v) MeOH:DCM indicating only the presence of  $^{13}\text{CO}_2$  when not photoirradiated at 450 – 460 nm.

| Complex                                                                                                                    | Time (hr) | TN        | Catalyst Concentration (mM)             | Wavelength of Irradiation           | Reference         |
|----------------------------------------------------------------------------------------------------------------------------|-----------|-----------|-----------------------------------------|-------------------------------------|-------------------|
| <i>fac</i> -[Re(bpy)(CO) <sub>3</sub> Cl] (1-Cl)                                                                           | 24        | 15        | 2.5                                     | <330nm                              | 3                 |
| <i>fac</i> -[Re(bpy)(CO) <sub>3</sub> (NCS)]                                                                               | 24        | 30        | 2.5                                     | <330nm                              | 3                 |
|                                                                                                                            |           |           |                                         |                                     |                   |
| [Re(4,4' - H <sub>2</sub> bpy)(CO) <sub>3</sub> P(OEt) <sub>3</sub> ] <sup>+</sup>                                         | 13        | 6.2       | 2.6                                     | 365nm                               | 4                 |
| Re(bpy) (CO) <sub>3</sub> {P(OEt) <sub>3</sub> } SbF <sub>6</sub>                                                          | 16        | 7.5       | 0.51                                    | 365nm                               | 5,6               |
| <i>cis,trans</i> -[Re(dmbpy)(CO) <sub>2</sub> (P <i>p</i> -FPh <sub>3</sub> )(P <i>p</i> -FPh <sub>3</sub> )] <sup>+</sup> | 16        | 17.3      | 0.5                                     | 365nm                               | 7                 |
| <i>fac</i> -[Re(phen-dione)(CO) <sub>3</sub> Cl]                                                                           | 0-24      | 25.5 - 34 | 0.2                                     | 365nm                               | 8                 |
|                                                                                                                            |           |           |                                         |                                     |                   |
| [ReSCN(bipy)(CO) <sub>3</sub> ]                                                                                            | 0.5       | 4.9       | 1                                       | < 400nm                             | 9                 |
| CPOP-30-Re                                                                                                                 | 4         | 17.3      | 10mgs of catalyst in 10mLs total volume | 390nm filter                        | 10                |
| [ReSCN(bipy)(CO) <sub>3</sub> ]                                                                                            | 2         | 26.4      | 1                                       | < 400nm                             | 9                 |
|                                                                                                                            |           |           |                                         |                                     |                   |
| [Re(BB2)(CO) <sub>3</sub> Cl]                                                                                              | 17hr      | 0         | 1.5                                     | >400nm or 495nm                     | 11                |
| Re-TXP-H <sub>2</sub>                                                                                                      | 24        | 13        | -                                       | >450                                | 12                |
| [Re(4,4'-H <sub>2</sub> -bpy)(CO) <sub>2</sub> (PR <sub>3</sub> )PPh <sub>3</sub> ]                                        | 6         | 16.5      | 1                                       | >400nm                              | 13                |
| [Re(Me-bpy)(CO) <sub>3</sub> Cl]-Phenyl                                                                                    | 17        | 22        | 1.5                                     | >430                                | 14                |
| Re(pyridylNHC-CF <sub>3</sub> )(CO) <sub>3</sub> X                                                                         | 4         | 0-40      | 0.1                                     | Solar Simulator                     | 15                |
| Anthryl-Re                                                                                                                 | a         | 16-43     | 0.05                                    | "Irradiated with a solar simulator" | 16                |
| <b>Re(5-PAN)</b>                                                                                                           | 1.5       | 48        | 3.6                                     | 450 - 460nm                         | <i>This Paper</i> |
| Re(bipy)(CO) <sub>3</sub> Cl + NEt <sub>4</sub> Cl                                                                         | 4         | 48        | 0.87                                    | >400nm                              | 17                |
| [Re(TPSbpy)(CO) <sub>3</sub> Cl]                                                                                           | 6         | 230       | 0.05                                    | "In The Visible Region"             | 18                |

**Table S1.** Overview of Re(I) based mononuclear complexes reported to catalyze the reduction of carbon dioxide.

Integration vs molarity of formic acid (D1=1s)

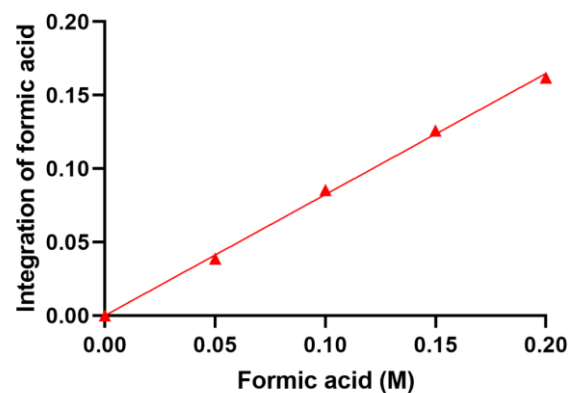

Integration vs molarity of formic acid (D1=2s)

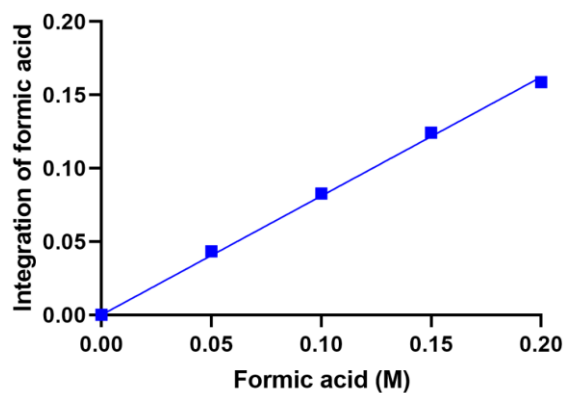

Integration vs molarity of formic acid (D1=5s)

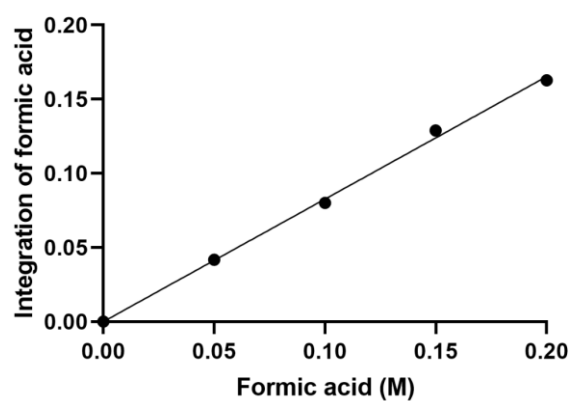

Integration vs molarity of formic acid

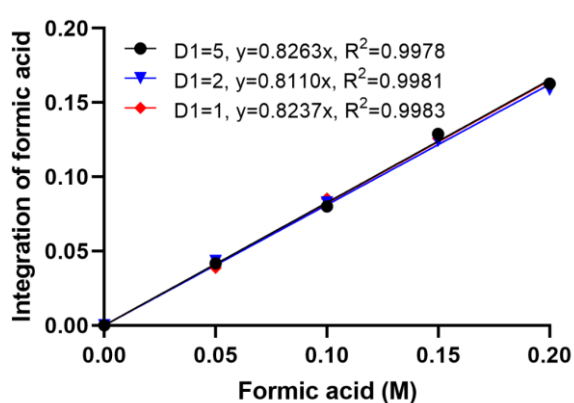

**S21.** Linear regression of the  $^{13}\text{C}$  NMR integration of  $\text{H}^{13}\text{COO}^-$  supplemented with an internal standard of 100eq. TEA at D1 relaxation times of D1 = 1s (**top left**), 2s (**top right**), and 5s (**bottom left**). Also displayed is an overlay of all of the independent linear regression at the previously described relaxations (**bottom right**).

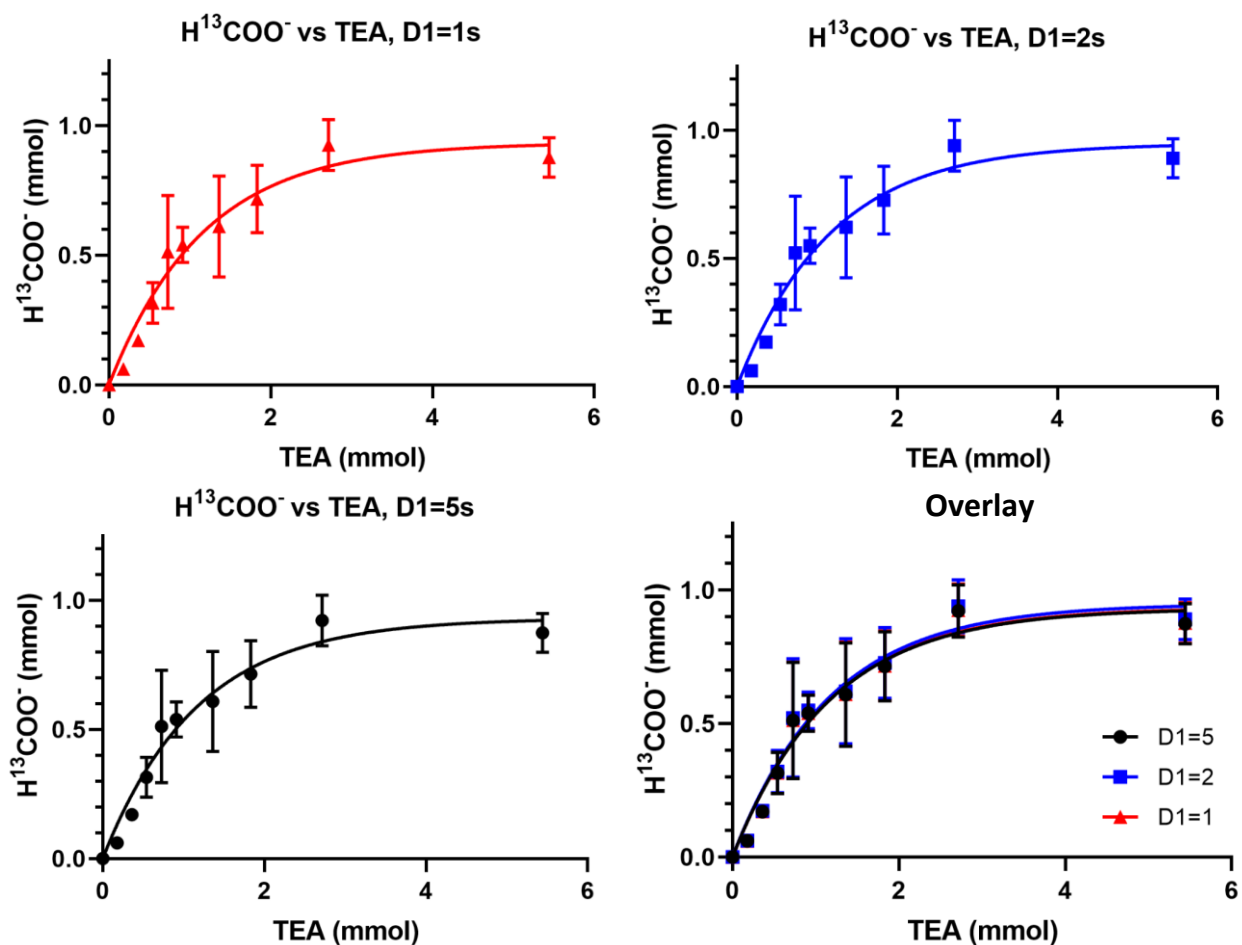

| TEA equiv. | TN (D1=5) | TN (D1=2) | TN (D1=1) |
|------------|-----------|-----------|-----------|
| 0          | 0         | 0         | 0         |
| 10         | 3.33      | 3.39      | 3.34      |
| 20         | 9.41      | 9.59      | 9.44      |
| 30         | 17.32     | 17.65     | 17.38     |
| 40         | 28.21     | 28.75     | 28.30     |
| 50         | 29.77     | 30.33     | 29.86     |
| 75         | 33.48     | 34.11     | 33.59     |
| 100        | 39.10     | 39.84     | 39.23     |
| 150        | 50.96     | 51.92     | 51.12     |
| 300        | 48.34     | 49.25     | 48.49     |

**S22.** Turnover numbers for **Re(5-PAN)** calculated from the linear regression of D1 = 1s (**top left**), 2s (**top right**), and 5s (**bottom left**). Also displayed is an overlay of all of the independent TN plots at the previously described relaxations (**bottom right**) showing similar R<sup>2</sup> values consistent about 0.96.

## References

- (1) Cotton, F.; Daniels, L. The Structure of Rhenium Pentacarbonyl Chloride,  $\text{Re}(\text{CO})_5\text{Cl}$ . *Acta. Cryst. C*. **1983**, 39 (11), 1495-1496
- (2) Haddad, S.; Marshall, J.; Crosby, G. *et al.* fac-Tricarbonylchloro(1,10-phenanthroline)rhenium (I). *Acta. Cryst. E*. **2002**, 58 (10), m559-m561
- (3) Takeda, H.; Koike, K.; Inoue, H.; Ishitani, O. Development of an Efficient Photocatalytic System for  $\text{CO}_2$  Reduction Using Rhenium(I) Complexes Based on Mechanistic Studies. *J. Am. Chem. Soc.* **2008**, 130 (6), 2023–2031.
- (4) Koike, K.; Hori, H.; Ishizuka, M.; Westwell, J. R.; Takeuchi, K.; Ibusuki, T.; Enjouji, K.; Konno, H.; Sakamoto, K.; Ishitani, O. Key Process of the Photocatalytic Reduction of  $\text{CO}_2$  Using  $[\text{Re}(4,4'\text{-X}_2\text{-Bipyridine})(\text{CO})_3\text{PR}_3] + (\text{X} = \text{CH}_3, \text{H}, \text{CF}_3; \text{PR}_3 = \text{Phosphorus Ligands})$ : Dark Reaction of the One-Electron-Reduced Complexes with  $\text{CO}_2$ . *Organometallics* **1997**, 16 (26), 5724–5729.
- (5) Hori, H.; Johnson, F. P. A.; Koike, K.; Ishitani, O.; Ibusuki, T. Efficient Photocatalytic  $\text{CO}_2$  Reduction Using  $[\text{Re}(\text{Bpy})(\text{CO})_3\{\text{P}(\text{OEt})_3\}] +$ . *J. Photochem. Photobiol. A Chem.* **1996**, 96 (1–3), 171–174.
- (6) Hori, H.; Ishihara, J.; Koike, K.; Takeuchi, K.; Ibusuki, T.; Ishitani, O. Photocatalytic Reduction of Carbon Dioxide Using  $[\text{Fac-Re}(\text{Bpy})(\text{CO})_3(4\text{-Xpy})] + (\text{Xpy} = \text{Pyridine Derivatives})$ . *J. Photochem. Photobiol. A Chem.* **1999**, 120 (2), 119–124.
- (7) Tsubaki, H.; Sugawara, A.; Takeda, H.; Gholamkhash, B.; Koike, K.; Ishitani, O. Photocatalytic reduction of  $\text{CO}_2$  using cis,trans- $[\text{Re}(\text{dmbpy})(\text{CO})_2(\text{PR}_3)(\text{PR}'_3)] + (\text{dmbpy} = 4,4'\text{-dimethyl-2,2'-bipyridine})$ . *Res. Chem. Intermed.* **2007**, 33 (1), 37–48.
- (8) Shakeri, J.; Farrokhpour, H.; Hadadzadeh, H.; Joshaghani, M. Photoreduction of  $\text{CO}_2$  to CO by a Mononuclear Re(I) Complex and DFT Evaluation of the Photocatalytic Mechanism. *RSC Adv.* **2015**, 5 (51), 41125–41134.
- (9) Kurz, P.; Probst, B.; Spingler, B.; Alberto, R. Ligand Variations in  $[\text{ReX}(\text{Diimine})(\text{CO})_3]$  Complexes: Effects on Photocatalytic  $\text{CO}_2$  Reduction. *Eur. J. Inorg. Chem.* **2006**, No. 15, 2966–2974.
- (10) Liang, H. P.; Acharjya, A.; Anito, D. A.; Vogl, S.; Wang, T. X.; Thomas, A.; Han, B. H. Rhenium-Metalated Polypyridine-Based Porous Polycarbazoles for Visible-Light  $\text{CO}_2$  Photoreduction. *ACS Catal.* **2019**, 9 (5), 3959–3968.
- (11) Teesdale, J. J.; Pistner, A. J.; Yap, G. P. A.; Ma, Y. Z.; Lutterman, D. A.; Rosenthal, J. Reduction of  $\text{CO}_2$  Using a Rhenium Bipyridine Complex Containing Ancillary BODIPY Moieties. *Catal. Today* **2014**, 225, 149–157.
- (12) Lang, P.; Pfrunder, M.; Quach, G.; Braun-Cula, B.; Moore, E. G.; Schwalbe, M. Sensitized Photochemical  $\text{CO}_2$  Reduction by Hetero-Pacman Compounds Linking a Re(I) Tricarbonyl with a Porphyrin Unit. *Chem. - A Eur. J.* **2019**, 25 (17), 4509–4519.
- (13) Morimoto, T.; Nakajima, T.; Sawa, S.; Nakanishi, R.; Imori, D.; Ishitani, O.  $\text{CO}_2$  Capture by a Rhenium(I) Complex with the Aid of Triethanolamine. **2013**, 1–4.
- (14) Andrade, G. A.; Pistner, A. J.; Yap, G. P. A.; Lutterman, D. A.; Rosenthal, J. Photocatalytic Conversion of  $\text{CO}_2$  to CO Using Rhenium Bipyridine Platforms Containing Ancillary Phenyl or BODIPY Moieties. *ACS Catal.* **2013**, 3 (8), 1685–1692.
- (15) Shirley, H.; Sexton, T. M.; Liyanage, N. P.; Palmer, C. Z.; McNamara, L. E.; Hammer, N. I.; Tschumper, G. S.; Delcamp, J. H. Effect of “X” Ligands on the Photocatalytic Reduction of  $\text{CO}_2$  to CO with  $\text{Re}(\text{PyridylNHC-CF}_3)(\text{CO})_3\text{X}$  Complexes. *Eur. J. Inorg. Chem.* **2020**, 2020 (19), 1844–1851.
- (16) Liyanage, N. P.; Yang, W.; Guertin, S.; Sinha Roy, S.; Carpenter, C. A.; Adams, R. E.; Schmehl, R. H.; Delcamp, J. H.; Jurss, J. W. Photochemical  $\text{CO}_2$  Reduction with Mononuclear and Dinuclear Rhenium Catalysts Bearing a Pendant Anthracene Chromophore. *Chem. Commun.* **2019**, 55 (7), 993–996.
- (17) Hawecker, J.; Lehn, J.; Ziesel, R. To Carbon Monoxide Mediated by (2,2'-Bipyridine) Tricarbonylchlororhenium (I) and Related Complexes as Homogeneous Catalysts. *Helv. Chim. Acta.* **1986**, 69 (1986), 1990.
- (18) Whang, D. R.; Apaydin, D. H.; Park, S. Y.; Sariciftci, N. S. An Electron-Reservoir Re(I) Complex for Enhanced Efficiency for Reduction of  $\text{CO}_2$  to CO. *J. Catal.* **2018**, 363, 191–196.
